# Supplementary material for: Mussel directed synthesis of SnO2/graphene oxide composite for energy storage
Source: Royal Society of Chemistry journal article supplement (doi:10.1039/d1qm01044a), 2021-01-01
Supplement: d1qm01044a1.pdf [file d1qm01044a1.pdf]

Supporting Information

**Mussel directed synthesis of SnO<sub>2</sub>/graphene oxide composite for energy storage**

*Wenhao Chi, Wenxuan Wang, Fuqiang Wan, Hang Ping, Zhaoyong Zou, Jingjing Xie,\* Weimin Wang, Zhengyi Fu\**

State Key Laboratory of Advanced Technology for Materials Synthesis and Processing, Wuhan University of Technology, Luoshi Road No. 122, Wuhan, 430070, China.

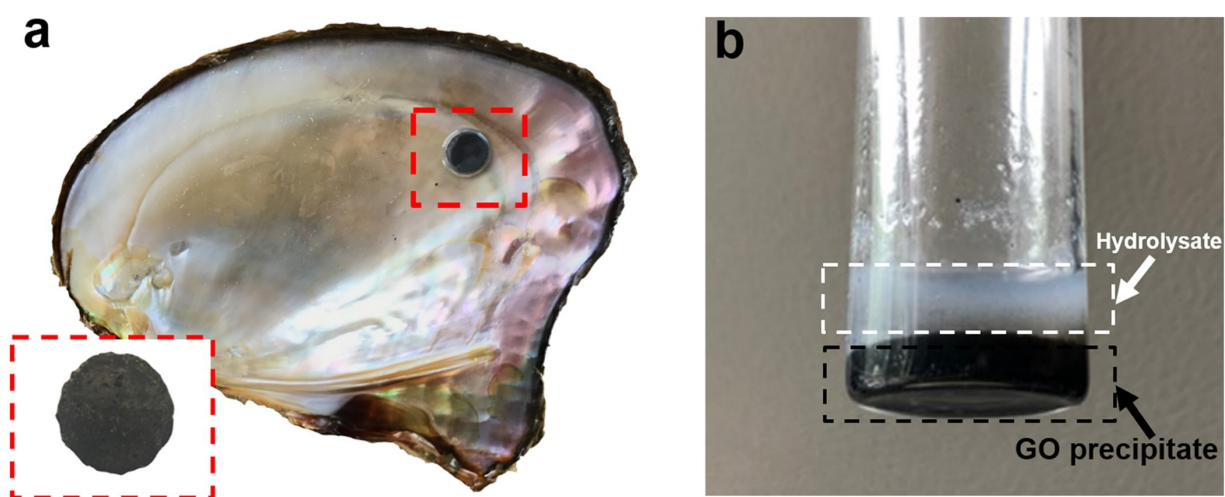

**Fig. S1.** Macroscopic pictures of blister pearl after different processing (a) mineralized in living mussels for 90 days. (b) aged in water for 90 days.

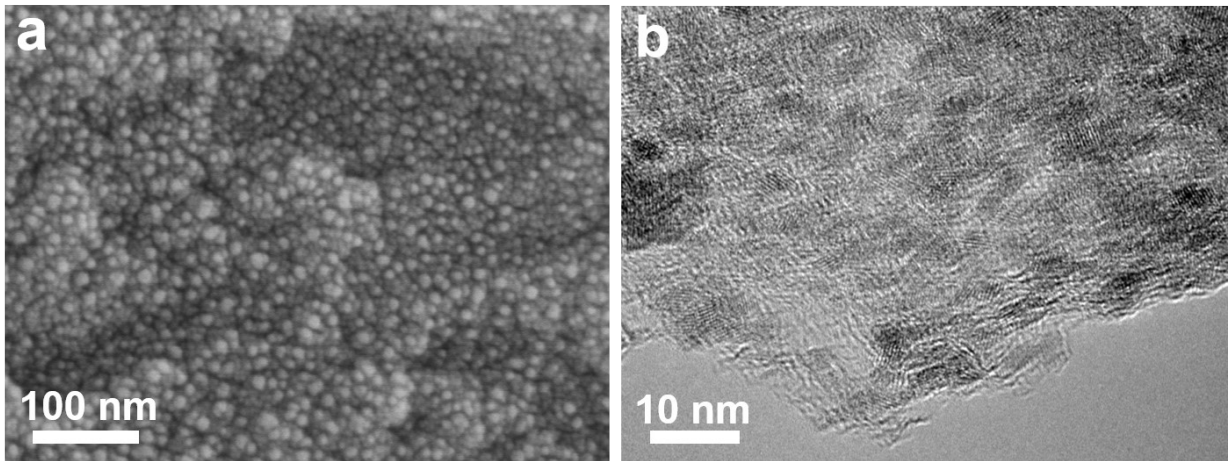

**Fig. S2.** SEM and TEM images of bm SnO<sub>2</sub>/GO.

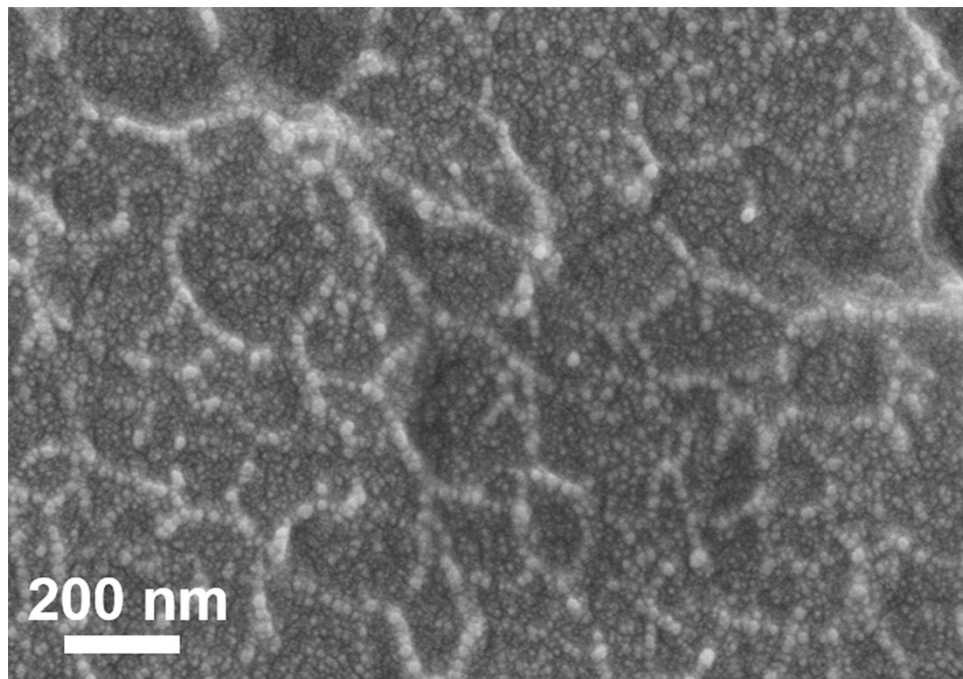

**Fig. S3.** SEM image of precursor aged in water for 90 days.

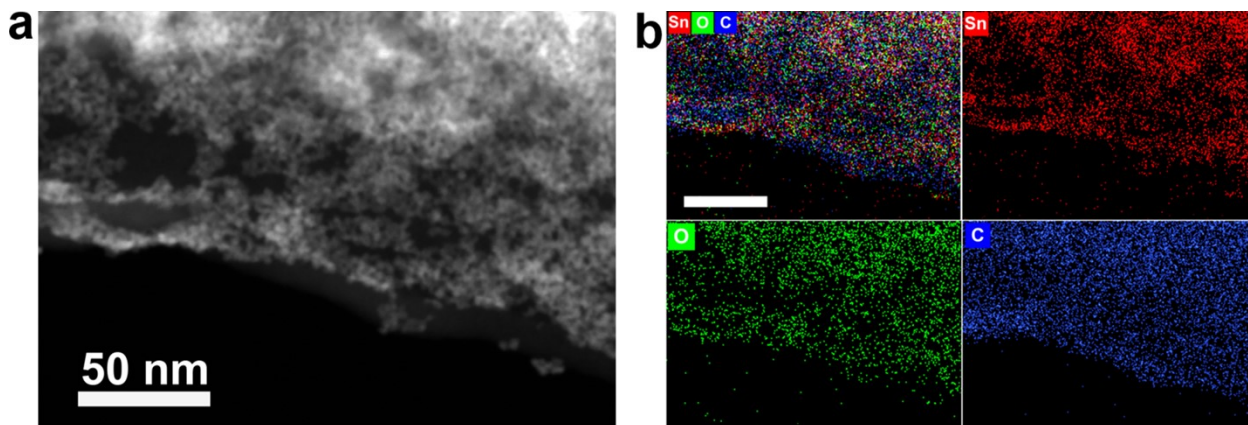

**Fig. S4.** (a) STEM image and (b) corresponding tin, oxygen, carbon EDX elemental mapping images of precursor aged in water for 90 days. Scale bar in the inset is 50 nm.

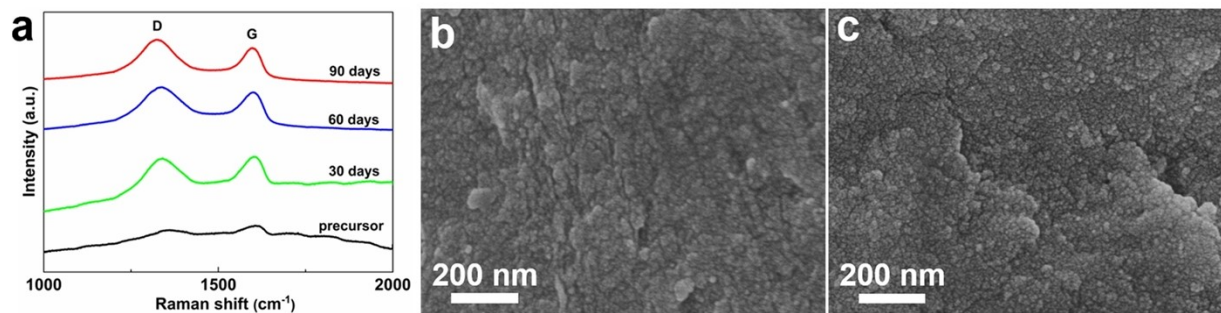

**Fig. S5.** (a) Raman spectra of bm SnO<sub>2</sub>/graphene oxide composite after mineralization of 0~90 days. SEM images of bm SnO<sub>2</sub>/graphene oxide composite after mineralization in living mussels for different lengths of time. (b) 30 days. (c) 60 days.

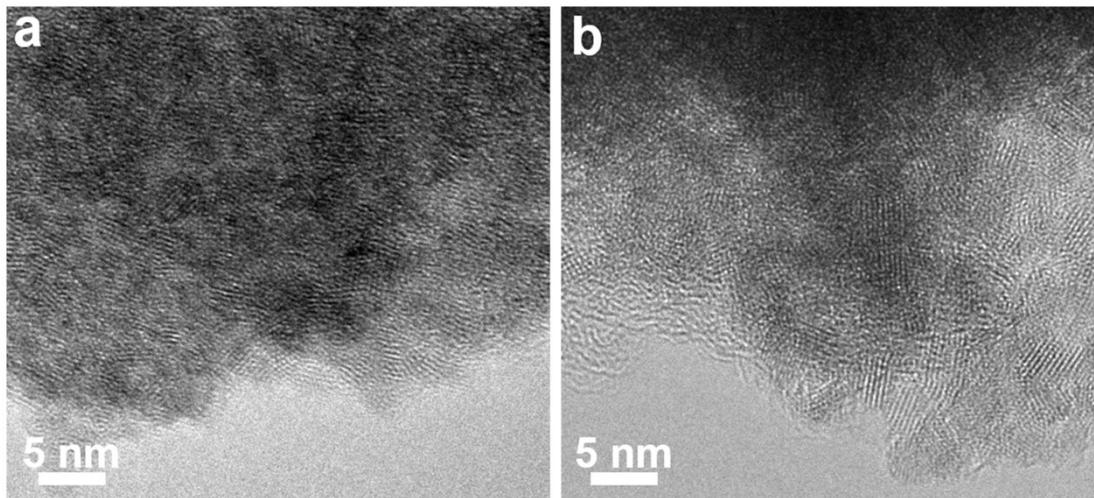

**Fig. S6.** HRTEM images of bm SnO<sub>2</sub>/graphene oxide composite after mineralization in living mussels for (a) 30 days. (b) 60 days.

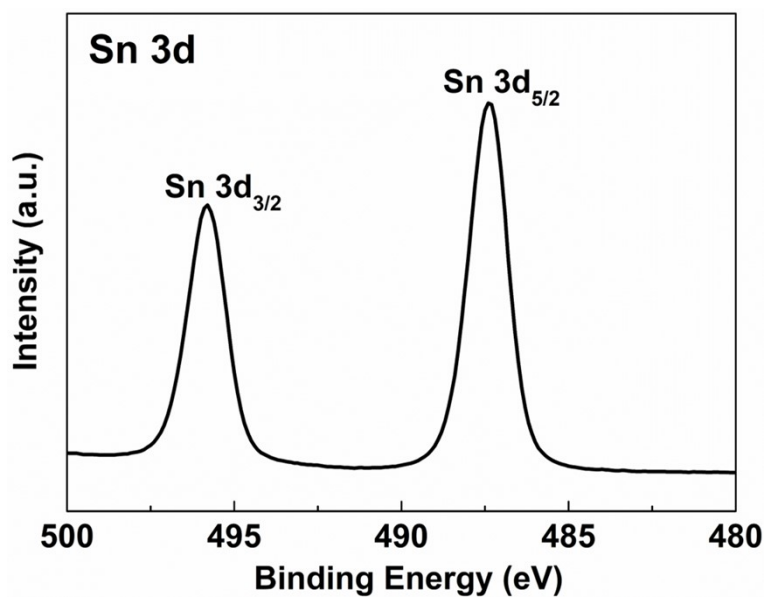

**Fig. S7.** High-resolution XPS Sn 3d spectrum.

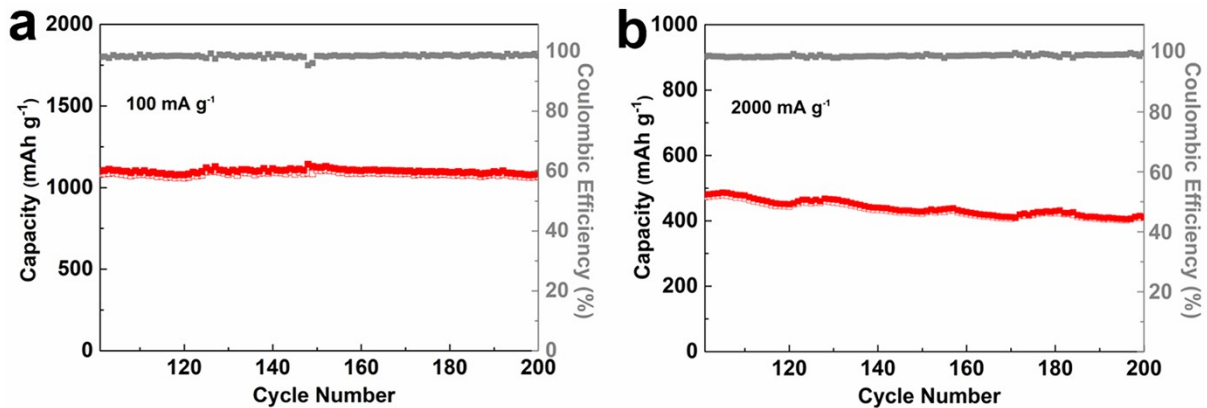

**Fig. S8.** Longer cycling performance at 100 mA g<sup>-1</sup> and 2000 mA g<sup>-1</sup> of bm SnO<sub>2</sub>/GO electrode.

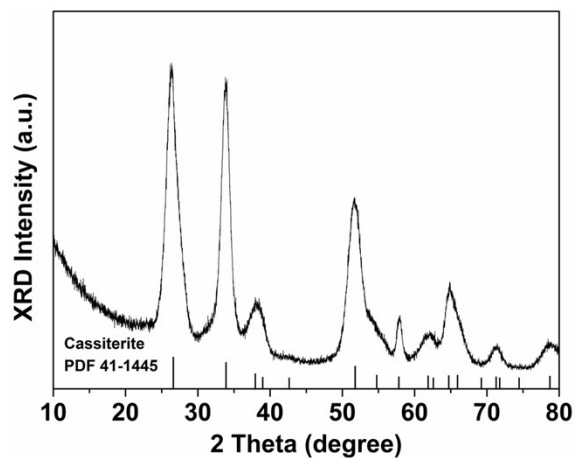

**Fig. S9.** XRD pattern of SnO<sub>2</sub>/GO synthesized by hydrothermal method.

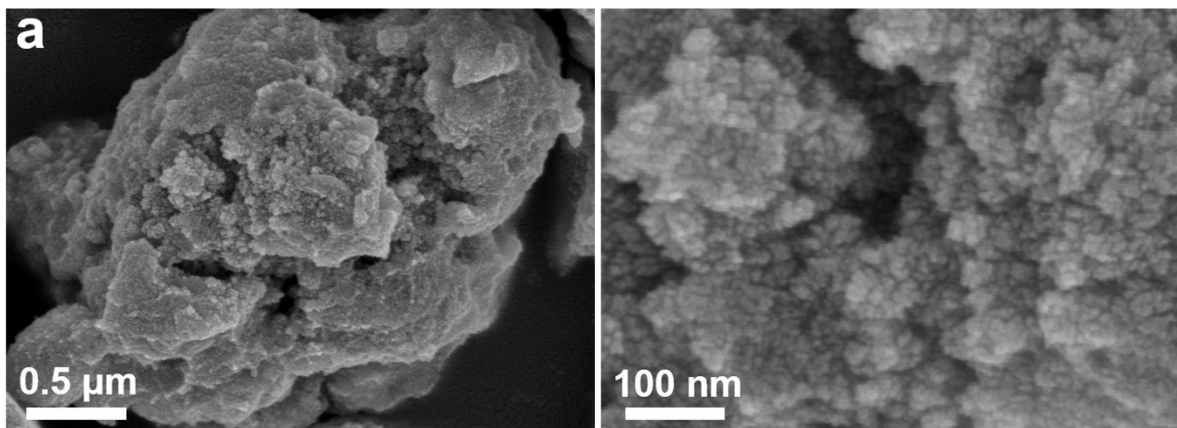

**Fig. S10.** SEM images of SnO<sub>2</sub>/GO synthesized by hydrothermal method.

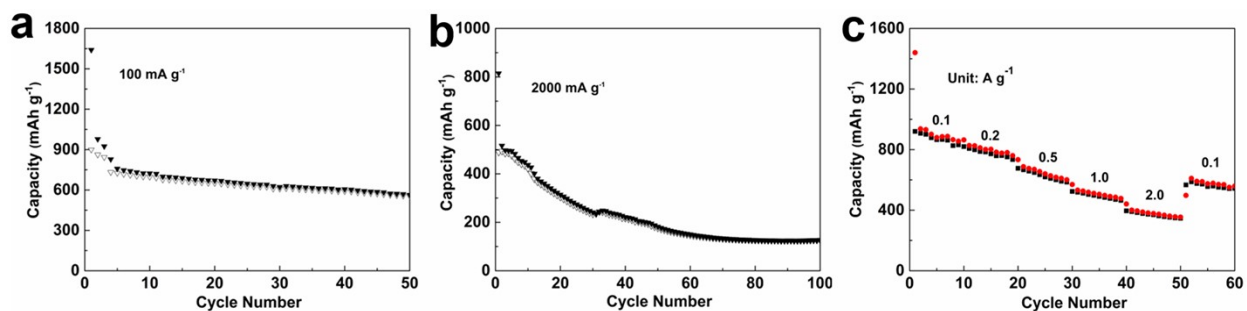

**Fig. S11.** Electrochemical performance of SnO<sub>2</sub>/GO electrode synthesized by hydrothermal method. Cycling performance at (a) 100 mA g<sup>-1</sup>. and (b) 2000 mA g<sup>-1</sup>. (c) Rate capability.

**Table S1.** Electrochemical performance comparison of bm SnO<sub>2</sub>/GO and reported state-of-the-art tin-based electrodes

| Sample                                                      | Current density (mA g <sup>-1</sup> ) | Cycle number | Discharge capacity (mA h g <sup>-1</sup> ) | Reference |
|-------------------------------------------------------------|---------------------------------------|--------------|--------------------------------------------|-----------|
| Biom mineralized SnO <sub>2</sub> /graphene oxide composite | 100                                   | 100          | 1099                                       | This Work |
| C@SnO <sub>2</sub> -rGO-SnO <sub>2</sub>                    | 2000                                  | 1200         | 525                                        | 1         |
| SnO <sub>2</sub> /Cu/GNS                                    | 100                                   | 200          | 890.6                                      | 2         |
| SnO <sub>2</sub> @CMK-8                                     | 780                                   | 500          | 629                                        | 3         |
| Sandwich-SnO <sub>2</sub> /GS                               | 2000                                  | 200          | 563.9                                      | 4         |
| ATO/rGO                                                     | 1249                                  | 100          | 813                                        | 5         |
| SnO <sub>2</sub> /GAs                                       | 100                                   | 50           | 702                                        | 6         |
| SnO <sub>2</sub> NR/RGO                                     | 200                                   | 70           | 1089                                       | 7         |
| HTGS/SnO <sub>2</sub>                                       | 50                                    | 50           | 940.3                                      | 8         |
| SnO <sub>2</sub> @RGO                                       | 500                                   | 100          | 817.2                                      | 9         |
| SnO <sub>2</sub> -QDs/N-GNs                                 | 100                                   | 80           | 800                                        | 10        |

## References

- 1 W. Q. Yao, B. S. Wu, L. Zhan and Y. L. Wang, Two-dimensional porous carbon-coated sandwich-like mesoporous SnO<sub>2</sub>/graphene/mesoporous SnO<sub>2</sub> nanosheets towards high-rate and long cycle life lithium-ion batteries, *Chem. Eng. J.*, 2019, **361**, 329-341.
- 2 Y. Jiang, Y. Y. Wan, W. Jiang, H. H. Tao, W. R. Li, S. S. Huang, Z. W. Chen and B. Zhao, Stabilizing the reversible capacity of SnO<sub>2</sub>/graphene composites by Cu nanoparticles, *Chem. Eng. J.*, 2019, **367**, 45-54.
- 3 D. Saikia, J. R. Deka, C. J. Chou, H. M. Kao and Y. C. Yang, 3D interpenetrating cubic mesoporous carbon supported nanosized SnO<sub>2</sub> as an efficient anode for high performance lithium-ion batteries, *J. Alloys Compd.*, 2019, **791**, 892-904.
- 4 B. Zhao, Z. X. Wang, S. S. Wang, J. L. Jiang, J. Si, S. S. Huang, Z. W. Chen, W. R. Li and Y. Jiang, Sandwiched spherical tin dioxide/graphene with a three-dimensional interconnected closed pore structure for lithium storage, *Nanoscale*, 2018, **10**, 16116-16126.
- 5 F. Zoller, K. Peters, P. M. Zehetmaier, P. Zeller, M. Döblinger, T. Bein, Z. Sofer and D. Fattakhova-Rohlfing, Making Ultrafast High-Capacity Anodes for Lithium-Ion Batteries via Antimony Doping of Nanosized Tin Oxide/Graphene Composites, *Adv. Funct. Mater.*, 2018, **28**, 1706529.
- 6 S. S. Huang, W. F. Wang, D. Y. Chen, Z. J. Hu, Y. Jiang, Z. W. Chen, Z. Li, D. Y. Pan and B. Zhao, Enhancing lithium-ion batteries performance via electron-beam irradiation strategies: A case study of graphene aerogels loaded with SnO<sub>2</sub> quantum dots, *Electrochim. Acta*, 2018, **281**, 769-776.
- 7 W. Zhang, X. Z. Xiao, Y. W. Zhang, J. P. Li, J. Y. Zhong, M. Li, X. L. Fan, C. T. Wang and L. X. Chen, In situ synthesized SnO<sub>2</sub> nanorod/reduced graphene oxide low-dimensional structure for enhanced lithium storage, *Nanotechnology*, 2018, **29**, 105705.

8 X. Y. Han, D. L. Zhao, W. J. Meng, H. X. Yang, Y. Q. Wu, R. Z. Gao, Y. Yang and H. Pu, Hollow tremella-like graphene sphere/SnO<sub>2</sub> composite for high performance Li-ion battery anodes, *Ceram. Int.*, 2019, **45**, 16244-16250.

9 L. M. Chang, Z. Yi, Z. M. Wang, L. M. Wang and Y. Cheng, Ultrathin SnO<sub>2</sub> nanosheets anchored on graphene with improved electrochemical kinetics for reversible lithium and sodium storage, *Appl. Surf. Sci.*, 2019, **484**, 646-654.

10 Z. T. Li, G. L. Wu, S. Z. Deng, S. J. Wang, Y. K. Wang, J. Y. Zhou, S. P. Liu, W. T. Wu and M. B. Wu, Combination of uniform SnO<sub>2</sub> nanocrystals with nitrogen doped graphene for high-performance lithium-ion batteries anode, *Chem. Eng. J.*, 2016, **283**, 1435-1442.
